# Supplementary material for: Regulation of DNA demethylation by the XPC DNA repair complex in somatic and pluripotent stem cells
Source: PubMed Central journal article supplement — Genes Dev. 2017 Apr 15;31(8):830–44. doi: 10.1101/gad.295741.116 (PMC5435894; doi:10.1101/gad.295741.116), 2017-04-15
Supplement: supp_31.8.830_Supplemental_Information.pdf [file supp_31.8.830_Supplemental_Information.pdf]

Supplemental information for

## **Regulation of DNA demethylation by the XPC DNA repair complex in somatic and pluripotent stem cells**

Jaclyn J. Ho, Claudia Cattoglio, David T. McSwiggen, Robert Tjian, Yick W. Fong

Supplemental material for this paper includes:

Supplemental Figure S1, related to Fig. 1

Supplemental Figure S2, related to Fig. 1

Supplemental Figure S3, related to Fig. 1

Supplemental Figure S4, related to Fig. 1

Supplemental Figure S5, related to Fig. 2

Supplemental Figure S6, related to Fig. 3

Supplemental Figure S7, related to Fig. 4

Supplemental Figure S8, related to Fig. 5

Supplemental Figure S9, related to Fig. 6

Supplemental Figure S10, related to Fig. 6

Supplemental Table S1, related to Fig. 3

Supplemental Table S2, related to Materials and Methods

Supplemental Movie S1, related to Fig. 4

Supplemental Materials and Methods
