# Supplementary material for: Regulation of DNA demethylation by the XPC DNA repair complex in somatic and pluripotent stem cells
Source: PubMed Central journal article supplement — Genes Dev. 2017 Apr 15;31(8):830–44. doi: 10.1101/gad.295741.116 (PMC5435894; doi:10.1101/gad.295741.116), 2017-04-15
Supplement: supp_31.8.830_Supplemental_Movie_S1_Legend.pdf [file supp_31.8.830_Supplemental_Movie_S1_Legend.pdf]

**Supplemental Movie S1, related to Figure 4. Example time-lapse video of TDG-Halo molecules using single-particle imaging.** TDG-Halo U2OS cells were co-transfected with SNAP-XPC and methylated (M.SssI-treated) plasmid DNA 24 hours prior to imaging. TDG-Halo molecules (green) were stochastically activated by sparse illumination using 405 nm light. SNAP-XPC signal (magenta) is superimposed on the video in order to delineate the nuclear boundary. Only TDG-Halo molecules within the nucleus are used in our calculations. Running time and scale bars are stamped on the video. Exposure time, 500 ms.
