# Supplementary material for: Regulation of DNA demethylation by the XPC DNA repair complex in somatic and pluripotent stem cells
Source: PubMed Central journal article supplement — Genes Dev. 2017 Apr 15;31(8):830–44. doi: 10.1101/gad.295741.116 (PMC5435894; doi:10.1101/gad.295741.116), 2017-04-15
Supplement: supp_31.8.830_Supplemental_Table_S1.pdf [file supp_31.8.830_Supplemental_Table_S1.pdf]

**Supplemental Table S1, related to Fig. 3. Additional motifs preferentially demethylation upon ectopic expression of XPC in pre-iPSCs.**

| <b>ID</b>                | <b>Name</b>  | <b>E-value</b> | <b>p-value</b> |
|--------------------------|--------------|----------------|----------------|
| <a href="#">MA0014.1</a> | Pax5         | 5.10E-122      | 3.40E-124      |
| <a href="#">MA0028.1</a> | ELK1         | 4.30E-114      | 2.90E-116      |
| <a href="#">MA0093.1</a> | USF1         | 3.40E-109      | 2.30E-111      |
| <a href="#">MA0104.1</a> | Mycn         | 1.40E-87       | 9.50E-90       |
| <a href="#">MA0062.2</a> | GABPA        | 6.50E-87       | 4.40E-89       |
| <a href="#">MA0059.1</a> | MYC::MAX     | 1.20E-81       | 8.30E-84       |
| <a href="#">MA0076.1</a> | ELK4         | 4.70E-80       | 3.20E-82       |
| <a href="#">MA0024.1</a> | E2F1         | 1.40E-76       | 9.20E-79       |
| <a href="#">MA0098.1</a> | ETS1         | 1.80E-68       | 1.20E-70       |
| <a href="#">MA0058.1</a> | MAX          | 3.60E-67       | 2.40E-69       |
| <a href="#">MA0062.1</a> | GABPA        | 1.40E-65       | 9.50E-68       |
| <a href="#">MA0003.1</a> | TFAP2A       | 7.30E-63       | 4.90E-65       |
| <a href="#">MA0100.1</a> | Myb          | 3.10E-53       | 2.10E-55       |
| <a href="#">MA0035.1</a> | Gata1        | 4.10E-49       | 2.70E-51       |
| <a href="#">MA0117.1</a> | Mafk         | 1.50E-47       | 9.80E-50       |
| <a href="#">MA0080.1</a> | SPI1         | 4.30E-43       | 2.90E-45       |
| <a href="#">MA0079.2</a> | SP1          | 5.40E-43       | 3.60E-45       |
| <a href="#">MA0057.1</a> | MZF1_5-13    | 1.60E-39       | 1.10E-41       |
| <a href="#">MA0130.1</a> | ZNF354C      | 1.60E-37       | 1.10E-39       |
| <a href="#">MA0067.1</a> | Pax2         | 5.40E-24       | 3.60E-26       |
| <a href="#">MA0018.2</a> | CREB1        | 8.80E-22       | 5.90E-24       |
| <a href="#">MA0112.1</a> | ESR1         | 4.00E-20       | 2.70E-22       |
| <a href="#">MA0056.1</a> | MZF1_1-4     | 1.90E-19       | 1.30E-21       |
| <a href="#">MA0007.1</a> | Ar           | 1.30E-16       | 8.50E-19       |
| <a href="#">MA0163.1</a> | PLAG1        | 5.60E-14       | 3.70E-16       |
| <a href="#">MA0159.1</a> | RXR::RAR_DR5 | 4.60E-13       | 3.10E-15       |
| <a href="#">MA0111.1</a> | Spz1         | 8.90E-12       | 6.00E-14       |
| <a href="#">MA0039.2</a> | Klf4         | 1.60E-09       | 1.10E-11       |
| <a href="#">MA0095.1</a> | YY1          | 2.60E-08       | 1.70E-10       |
| <a href="#">MA0079.1</a> | SP1          | 3.10E-08       | 2.10E-10       |
| <a href="#">MA0149.1</a> | EWSR1-FLI1   | 3.80E-08       | 2.50E-10       |
| <a href="#">MA0088.1</a> | znf143       | 4.60E-08       | 3.10E-10       |
| <a href="#">MA0048.1</a> | NHLH1        | 1.20E-07       | 8.00E-10       |
| <a href="#">MA0036.1</a> | GATA2        | 5.10E-07       | 3.40E-09       |
| <a href="#">MA0139.1</a> | CTCF         | 9.80E-07       | 6.60E-09       |
| <a href="#">MA0055.1</a> | Myf          | 1.20E-05       | 8.40E-08       |
| <a href="#">MA0141.1</a> | Esrrb        | 1.20E-04       | 7.80E-07       |
| <a href="#">MA0138.2</a> | REST         | 1.10E-02       | 7.20E-05       |
| <a href="#">MA0069.1</a> | Pax6         | 1.20E-02       | 8.00E-05       |

|                          |             |          |          |
|--------------------------|-------------|----------|----------|
| <a href="#">MA0137.1</a> | STAT1       | 1.50E-02 | 9.90E-05 |
| <a href="#">MA0050.1</a> | IRF1        | 3.40E-02 | 2.30E-04 |
| <a href="#">MA0065.2</a> | PPARG::RXRA | 5.00E-02 | 3.30E-04 |
| <a href="#">MA0103.1</a> | ZEB1        | 9.50E-02 | 6.40E-04 |
