# Supplementary material for: Regulation of DNA demethylation by the XPC DNA repair complex in somatic and pluripotent stem cells
Source: PubMed Central journal article supplement — Genes Dev. 2017 Apr 15;31(8):830–44. doi: 10.1101/gad.295741.116 (PMC5435894; doi:10.1101/gad.295741.116), 2017-04-15
Supplement: supp_31.8.830_Supplemental_Table_S2.pdf [file supp_31.8.830_Supplemental_Table_S2.pdf]

**Supplemental Table 2. Primer sequences used in study.**

**shRNA Primer Sequences for cloning into pLKO.1**

|                              |                                                            |
|------------------------------|------------------------------------------------------------|
| <b>shAPE1-497 (5' → 3')</b>  |                                                            |
| Forward                      | CCGGCCTGGATTAAGAAGAAAGGATCTCGAGATCCTTTCTTCTTAATCCAGGTTTTTG |
| Reverse                      | AATTCAAAAACCTGGATTAAGAAGAAAGGATCTCGAGATCCTTTCTTCTTAATCCAGG |
| <b>shAPE1-660 (5' → 3')</b>  |                                                            |
| Forward                      | CCGGGCCTGGACTCTCTCATCAATACTCGAGTATTGATGAGAGAGTCCAGGCTTTTTG |
| Reverse                      | AATTCAAAAAGCCTGGACTCTCTCATCAATACTCGAGTATTGATGAGAGAGTCCAGGC |
| <b>shNEIL2-149 (5' → 3')</b> |                                                            |
| Forward                      | CCGGGGTGAGGAAATTTACCATTCTCGAGAAATGGTGAAATTCCTCACCTTTTTG    |
| Reverse                      | AATTCAAAAAGGTGAGGAAATTTACCATTCTCGAGAAATGGTGAAATTCCTCAC     |
| <b>shNEIL2-550 (5' → 3')</b> |                                                            |
| Forward                      | CCGGGCGTTTGGGTGAACGATTTCTCTCGAGAGAAATCGTTCACCCAAACGCTTTTTG |
| Reverse                      | AATTCAAAAAGCGTTTGGGTGAACGATTTCTCTCGAGAGAAATCGTTCACCCAAACGC |
| <b>shXPC-203 (5' → 3')</b>   |                                                            |
| Forward                      | CCGGGGAGGATGCCTTTGAAGATGACTCGAGTCATCTTCAAAGGCATCCTCCTTTTTG |
| Reverse                      | AATTCAAAAAGGAGGATGCCTTTGAAGATGACTCGAGTCATCTTCAAAGGCATCCTCC |
| <b>shXPC-503 (5' → 3')</b>   |                                                            |
| Forward                      | CCGGGAAGAGGTTGAAGAACTTAGCTCGAGCTAAGTTCTTCAACCTCTCCTTTTTG   |
| Reverse                      | AATTCAAAAAGGAAGAGGTTGAAGAACTTAGCTCGAGCTAAGTTCTTCAACCTCTCC  |

**XPC guide RNA primer sequences for cloning into pX330-Venus**

|           | <b>Forward (5' → 3')</b>  | <b>Reverse (5' → 3')</b>  |
|-----------|---------------------------|---------------------------|
| 5' Exon 1 | CACCGATGGCTCGGAAACGCGCGGC | AAACGCCGCGCGTTTCCGAGCCATC |
| 3' Exon 1 | CACCGTCGCGGGAGACGCCGCCGGT | AAACACCGGCGGCGTCTCCCGCGAC |
| 5' Exon 2 | CACCGTGTGAATATAGACTAGCCGC | AAACGCGGCTAGTCTATATTCACAC |
| 3' Exon 2 | CACCGCAACTCAGACCGGTAAGAGC | AAACGCTCTTACCGGTCTGAGTTGC |

**In vitro TDG glycosylase assay substrates**

**37mer substrate (5' → 3')**

Forward /Cy3/GAGTCATGCCATTGGCCACATXGTGTCAGCTAGGATT  
 Reverse CAATCCTAGCTGACACGATGTGGCCAATGGCATGACT

\*\*where X is replaced with T, 5hmU, 5fC, or 5caC

## RT-qPCR primer sequences

|         | <b>Forward (5' → 3')</b>   | <b>Reverse (5' → 3')</b>  |
|---------|----------------------------|---------------------------|
| hActb   | TCACCCACACTGTGCCCATCTACGA  | CAGCGGAACCGCTCATTGCCAATGG |
| hApe1   | CCAGCCCTGTATGAGGACC        | GGAGCTGACCAGTATTGATGAGA   |
| hCripto | AGAAGTGTTCCCTGTGTAAATGCTG  | CACGAGGTGCTCATCCATCA      |
| hDnmt1  | GGAAGCCGGCAAAGCCT          | TCCCCTCGAGCCTTCCATA       |
| hDnmt3b | GCTAAGCTACACACAGGACTTGACAG | AGTTCGGACAGCTGGGCTTT      |
| hGapdh  | TCTGCTCCTCCTGTTTCGACA      | AAAAGCAGCCCTGGTGACC       |
| hKlf4   | GATGAACTGACCAGGCACTA       | GTGGGTCATATCCACTGTCT      |
| hNanog  | CCAACATCCTGAACCTCAGCTAC    | GCCTTCTGCGTCACACCATT      |
| hNeil2  | AGCTTCCCCGTAGAAGAGGAT      | TTCATGGACCTGGGTGTCC       |
| hOct4   | TCGAGAACCGAGTGAGAGGC       | CACACTCGGACCACATCCTTC     |
| hRad23b | AGCCTGCAGAAAAGCCAGCAGA     | CGTAAGACTGACCCGTCACAAGTGC |
| hRex1   | TGAATAGCTGACCACCAGCACACT   | ACAGGCTCCAGCCTCAGTACATTT  |
| hSox2   | CACACTGCCCTCTCACACAT       | CATTTCCCTCGTTTTTCTTTGAA   |
| hTdg    | CTTGCCCAAGAGGATGCAAAG      | GGAATGCCACTGAAAGCTGAT     |
| hXPC    | ACGCCAGAGCAGGCGAAGAC       | AGGTGAACCTTGTGTGTGTCCTCA  |
| mActb   | GATCTGGCACCACACCTTCT       | GGGGTGTGAAGGTCTCAA        |
| mXPC    | CTGGATGACCGCAACCCGCA       | GCTGGTCCAGGTGCTTCGCC      |

h, human; m, mouse
